# Supplementary material for: Gene expression dynamic analysis reveals co-activation of Sonic Hedgehog and epidermal growth factor followed by dynamic silencing
Source: PubMed Central journal article supplement (PMC7170495; doi:10.18632/oncotarget.27547), 2020-04-14
Supplement: oncotarget-11-1358-s001.pdf [file oncotarget-11-1358-s001.pdf]

## Gene expression dynamic analysis reveals co-activation of Sonic Hedgehog and epidermal growth factor followed by dynamic silencing

### SUPPLEMENTARY MATERIALS

#### Western blot

The samples were loaded on an SDS-PAGE gel and run at 110V for 1hr. After transferring the proteins to a PVDF membrane, the membrane was blocked with 5% milk solution, followed by incubation with primary antibody (anti-Shh, C9C5, Cell Signaling, 1:1000) overnight at 4°C. The membrane was washed 3 times with

TBS-Tween 20 and incubated with an anti-rabbit IgG HRP-linked antibody (Cell Signaling, 7074, 1:2000) for 1 hour at RT. Then, the membrane was washed 3 times with TBS-Tween 20, developed with chemiluminescence substrate (ThermoFisher), and images were captured with an Odyssey Fc imaging system (LI-COR).

## GRM\_C1

| Annotation Cluster   | Enrichment Score                                                       |          |  |
|----------------------|------------------------------------------------------------------------|----------|--|
| Annotation Cluster 1 | Enrichment Score: 1.93                                                 | <b>G</b> |  |
| UP_KEYWORDS          | <a href="#">Ubl conjugation pathway</a>                                | RT       |  |
| GOTERM_MF_DIRECT     | <a href="#">ubiquitin-protein transferase activity</a>                 | RT       |  |
| GOTERM_BP_DIRECT     | <a href="#">protein ubiquitination</a>                                 | RT       |  |
| Annotation Cluster 2 | Enrichment Score: 1.83                                                 | <b>G</b> |  |
| UP_KEYWORDS          | <a href="#">Zinc-finger</a>                                            | RT       |  |
| UP_KEYWORDS          | <a href="#">Zinc</a>                                                   | RT       |  |
| UP_KEYWORDS          | <a href="#">Metal-binding</a>                                          | RT       |  |
| GOTERM_MF_DIRECT     | <a href="#">metal ion binding</a>                                      | RT       |  |
| Annotation Cluster 3 | Enrichment Score: 1.68                                                 | <b>G</b> |  |
| UP_KEYWORDS          | <a href="#">Wnt signaling pathway</a>                                  | RT       |  |
| GOTERM_BP_DIRECT     | <a href="#">negative regulation of canonical Wnt signaling pathway</a> | RT       |  |
| GOTERM_BP_DIRECT     | <a href="#">Wnt signaling pathway</a>                                  | RT       |  |

## GRM\_C2

| Annotation Cluster   | Enrichment Score                                                  |          |  |
|----------------------|-------------------------------------------------------------------|----------|--|
| Annotation Cluster 1 | Enrichment Score: 6.46                                            | <b>G</b> |  |
| UP_KEYWORDS          | <a href="#">Cell cycle</a>                                        | RT       |  |
| UP_KEYWORDS          | <a href="#">Mitosis</a>                                           | RT       |  |
| UP_KEYWORDS          | <a href="#">Cell division</a>                                     | RT       |  |
| GOTERM_BP_DIRECT     | <a href="#">cell division</a>                                     | RT       |  |
| GOTERM_BP_DIRECT     | <a href="#">mitotic nuclear division</a>                          | RT       |  |
| Annotation Cluster 2 | Enrichment Score: 6.03                                            | <b>G</b> |  |
| GOTERM_BP_DIRECT     | <a href="#">DNA replication</a>                                   | RT       |  |
| UP_KEYWORDS          | <a href="#">DNA replication</a>                                   | RT       |  |
| KEGG_PATHWAY         | <a href="#">DNA replication</a>                                   | RT       |  |
| GOTERM_BP_DIRECT     | <a href="#">G1/S transition of mitotic cell cycle</a>             | RT       |  |
| GOTERM_BP_DIRECT     | <a href="#">DNA replication initiation</a>                        | RT       |  |
| GOTERM_BP_DIRECT     | <a href="#">telomere maintenance via recombination</a>            | RT       |  |
| GOTERM_CC_DIRECT     | <a href="#">alpha DNA polymerase:primase complex</a>              | RT       |  |
| GOTERM_BP_DIRECT     | <a href="#">DNA strand elongation involved in DNA replication</a> | RT       |  |
| KEGG_PATHWAY         | <a href="#">Pyrimidine metabolism</a>                             | RT       |  |
| GOTERM_MF_DIRECT     | <a href="#">DNA primase activity</a>                              | RT       |  |
| GOTERM_BP_DIRECT     | <a href="#">DNA replication, synthesis of RNA primer</a>          | RT       |  |
| KEGG_PATHWAY         | <a href="#">Purine metabolism</a>                                 | RT       |  |
| GOTERM_MF_DIRECT     | <a href="#">DNA-directed DNA polymerase activity</a>              | RT       |  |
| UP_KEYWORDS          | <a href="#">Nucleotidyltransferase</a>                            | RT       |  |
| Annotation Cluster 3 | Enrichment Score: 5.06                                            | <b>G</b> |  |
| UP_KEYWORDS          | <a href="#">DNA damage</a>                                        | RT       |  |
| UP_KEYWORDS          | <a href="#">DNA repair</a>                                        | RT       |  |
| GOTERM_BP_DIRECT     | <a href="#">DNA repair</a>                                        | RT       |  |
| GOTERM_MF_DIRECT     | <a href="#">damaged DNA binding</a>                               | RT       |  |

## GRM\_C3

| Annotation Cluster   | Enrichment Score                                                       |          |  |
|----------------------|------------------------------------------------------------------------|----------|--|
| Annotation Cluster 1 | 7.02                                                                   | <b>G</b> |  |
| UP_KEYWORDS          | <a href="#">Cell cycle</a>                                             | RT       |  |
| UP_KEYWORDS          | <a href="#">Cell division</a>                                          | RT       |  |
| UP_KEYWORDS          | <a href="#">Mitosis</a>                                                | RT       |  |
| GOTERM_BP_DIRECT     | <a href="#">cell division</a>                                          | RT       |  |
| GOTERM_BP_DIRECT     | <a href="#">mitotic nuclear division</a>                               | RT       |  |
| Annotation Cluster 2 | 2.95                                                                   | <b>G</b> |  |
| UP_KEYWORDS          | <a href="#">Nucleotide-binding</a>                                     | RT       |  |
| UP_KEYWORDS          | <a href="#">ATP-binding</a>                                            | RT       |  |
| GOTERM_MF_DIRECT     | <a href="#">ATP binding</a>                                            | RT       |  |
| UP_SEQ_FEATURE       | nucleotide phosphate-binding region:ATP                                | RT       |  |
| INTERPRO             | <a href="#">P-loop containing nucleoside triphosphate hydrolase</a>    | RT       |  |
| Annotation Cluster 3 | 2.38                                                                   | <b>G</b> |  |
| GOTERM_BP_DIRECT     | <a href="#">DNA replication</a>                                        | RT       |  |
| UP_KEYWORDS          | <a href="#">DNA replication</a>                                        | RT       |  |
| KEGG_PATHWAY         | <a href="#">DNA replication</a>                                        | RT       |  |
| KEGG_PATHWAY         | <a href="#">Mismatch repair</a>                                        | RT       |  |
| GOTERM_BP_DIRECT     | <a href="#">telomere maintenance via recombination</a>                 | RT       |  |
| KEGG_PATHWAY         | <a href="#">Nucleotide excision repair</a>                             | RT       |  |
| GOTERM_BP_DIRECT     | <a href="#">nucleotide-excision repair, DNA gap filling</a>            | RT       |  |
| GOTERM_BP_DIRECT     | <a href="#">transcription-coupled nucleotide-excision repair</a>       | RT       |  |
| GOTERM_BP_DIRECT     | <a href="#">nucleotide-excision repair, DNA incision, 5'-to lesion</a> | RT       |  |
| GOTERM_BP_DIRECT     | <a href="#">nucleotide-excision repair, DNA incision</a>               | RT       |  |

## GRM\_C4

| Annotation Cluster   | Enrichment Score                                   |          |  |
|----------------------|----------------------------------------------------|----------|--|
| Annotation Cluster 1 | 1.98                                               | <b>G</b> |  |
| UP_KEYWORDS          | <a href="#">Chaperone</a>                          | RT       |  |
| GOTERM_BP_DIRECT     | <a href="#">protein folding</a>                    | RT       |  |
| GOTERM_MF_DIRECT     | <a href="#">chaperone binding</a>                  | RT       |  |
| GOTERM_MF_DIRECT     | <a href="#">unfolded protein binding</a>           | RT       |  |
| Annotation Cluster 2 | 1.85                                               | <b>G</b> |  |
| UP_SEQ_FEATURE       | domain:Fibronectin type-III 2                      | RT       |  |
| UP_SEQ_FEATURE       | domain:Fibronectin type-III 1                      | RT       |  |
| UP_SEQ_FEATURE       | domain:Fibronectin type-III 5                      | RT       |  |
| UP_SEQ_FEATURE       | domain:Fibronectin type-III 4                      | RT       |  |
| UP_SEQ_FEATURE       | domain:Fibronectin type-III 3                      | RT       |  |
| Annotation Cluster 3 | 1.69                                               | <b>G</b> |  |
| SMART                | <a href="#">KH</a>                                 | RT       |  |
| INTERPRO             | <a href="#">K Homology domain</a>                  | RT       |  |
| INTERPRO             | <a href="#">K Homology domain, type 1</a>          | RT       |  |
| GOTERM_BP_DIRECT     | <a href="#">negative regulation of translation</a> | RT       |  |
| UP_SEQ_FEATURE       | domain:KH 1                                        | RT       |  |
| UP_SEQ_FEATURE       | domain:KH 2                                        | RT       |  |
| GOTERM_MF_DIRECT     | <a href="#">mRNA binding</a>                       | RT       |  |
| GOTERM_CC_DIRECT     | <a href="#">polysome</a>                           | RT       |  |

## GRM\_C5

|                      |                                                       |                    |                                                                                     |
|----------------------|-------------------------------------------------------|--------------------|-------------------------------------------------------------------------------------|
| Annotation Cluster 1 | Enrichment Score: 3.66                                | <b>G</b>           |                                                                                     |
| UP_KEYWORDS          | <a href="#">Stress response</a>                       | <a href="#">RT</a> |  |
| INTERPRO             | <a href="#">Heat shock protein 70, conserved site</a> | <a href="#">RT</a> |  |
| INTERPRO             | <a href="#">Heat shock protein 70 family</a>          | <a href="#">RT</a> |  |
| Annotation Cluster 2 | Enrichment Score: 3.35                                | <b>G</b>           |                                                                                     |
| UP_KEYWORDS          | <a href="#">Stress response</a>                       | <a href="#">RT</a> |  |
| GOTERM_BP_DIRECT     | <a href="#">response to unfolded protein</a>          | <a href="#">RT</a> |  |
| UP_KEYWORDS          | <a href="#">Chaperone</a>                             | <a href="#">RT</a> |  |
| GOTERM_MF_DIRECT     | <a href="#">unfolded protein binding</a>              | <a href="#">RT</a> |  |
| Annotation Cluster 3 | Enrichment Score: 1.07                                | <b>G</b>           |                                                                                     |
| UP_KEYWORDS          | <a href="#">ATP-binding</a>                           | <a href="#">RT</a> |  |
| GOTERM_MF_DIRECT     | <a href="#">ATP binding</a>                           | <a href="#">RT</a> |  |
| UP_KEYWORDS          | <a href="#">Nucleotide-binding</a>                    | <a href="#">RT</a> |  |

**Supplementary Figure 1: Enrichment cluster analysis of the LS-GRM in the CTRL group.** Enrichment cluster analysis of 5 major LS-GRM genes was performed by using the DAVID functional annotation clustering tool. For each GRM, the first three major clusters are presented here.

## A Genes of DRG under both CTRL and SHH conditions.

| Annotation Cluster 1 |                                                   | Enrichment Score: 13.97 | G |
|----------------------|---------------------------------------------------|-------------------------|---|
| UP_KEYWORDS          | <a href="#">Cell cycle</a>                        | RT                      |   |
| UP_KEYWORDS          | <a href="#">Cell division</a>                     | RT                      |   |
| UP_KEYWORDS          | <a href="#">Mitosis</a>                           | RT                      |   |
| GOTERM_BP_DIRECT     | <a href="#">cell division</a>                     | RT                      |   |
| GOTERM_BP_DIRECT     | <a href="#">mitotic nuclear division</a>          | RT                      |   |
| Annotation Cluster 2 |                                                   | Enrichment Score: 5.58  | G |
| UP_KEYWORDS          | <a href="#">DNA damage</a>                        | RT                      |   |
| UP_KEYWORDS          | <a href="#">DNA repair</a>                        | RT                      |   |
| GOTERM_BP_DIRECT     | <a href="#">DNA repair</a>                        | RT                      |   |
| Annotation Cluster 3 |                                                   | Enrichment Score: 3.71  | G |
| GOTERM_BP_DIRECT     | <a href="#">sister chromatid cohesion</a>         | RT                      |   |
| UP_KEYWORDS          | <a href="#">Centromere</a>                        | RT                      |   |
| UP_KEYWORDS          | <a href="#">Kinetochores</a>                      | RT                      |   |
| GOTERM_CC_DIRECT     | <a href="#">condensed chromosome kinetochores</a> | RT                      |   |

## B Genes silent under CTRL and DRG under SHH.

| Annotation Cluster 1 |                                                              | Enrichment Score: 2.9  | G |
|----------------------|--------------------------------------------------------------|------------------------|---|
| UP_KEYWORDS          | <a href="#">Nucleotide-binding</a>                           | RT                     |   |
| UP_KEYWORDS          | <a href="#">ATP-binding</a>                                  | RT                     |   |
| UP_SEQ_FEATURE       | domain:Protein kinase                                        | RT                     |   |
| UP_SEQ_FEATURE       | nucleotide phosphate-binding region:ATP                      | RT                     |   |
| UP_KEYWORDS          | <a href="#">Kinase</a>                                       | RT                     |   |
| INTERPRO             | <a href="#">Protein kinase, catalytic domain</a>             | RT                     |   |
| UP_SEQ_FEATURE       | binding site:ATP                                             | RT                     |   |
| UP_SEQ_FEATURE       | active site:Proton acceptor                                  | RT                     |   |
| INTERPRO             | <a href="#">Protein kinase-like domain</a>                   | RT                     |   |
| UP_KEYWORDS          | <a href="#">Transferase</a>                                  | RT                     |   |
| GOTERM_MF_DIRECT     | <a href="#">protein kinase activity</a>                      | RT                     |   |
| GOTERM_MF_DIRECT     | <a href="#">ATP binding</a>                                  | RT                     |   |
| UP_KEYWORDS          | <a href="#">Serine/threonine-protein kinase</a>              | RT                     |   |
| SMART                | <a href="#">S_TKc</a>                                        | RT                     |   |
| INTERPRO             | <a href="#">Serine/threonine-protein kinase, active site</a> | RT                     |   |
| GOTERM_MF_DIRECT     | <a href="#">protein serine/threonine kinase activity</a>     | RT                     |   |
| INTERPRO             | <a href="#">Protein kinase, ATP binding site</a>             | RT                     |   |
| GOTERM_BP_DIRECT     | <a href="#">protein phosphorylation</a>                      | RT                     |   |
| Annotation Cluster 2 |                                                              | Enrichment Score: 2.49 | G |
| UP_SEQ_FEATURE       | repeat:WD 6                                                  | RT                     |   |
| UP_KEYWORDS          | <a href="#">WD repeat</a>                                    | RT                     |   |
| INTERPRO             | <a href="#">WD40 repeat</a>                                  | RT                     |   |
| UP_SEQ_FEATURE       | repeat:WD 1                                                  | RT                     |   |
| UP_SEQ_FEATURE       | repeat:WD 2                                                  | RT                     |   |
| UP_SEQ_FEATURE       | repeat:WD 3                                                  | RT                     |   |
| UP_SEQ_FEATURE       | repeat:WD 5                                                  | RT                     |   |
| SMART                | <a href="#">WD40</a>                                         | RT                     |   |

### C Genes of DRG under SHH but silent under EGF+SHH+.

| Annotation Cluster 1 |                                                            | Enrichment Score: 2.99 | G |
|----------------------|------------------------------------------------------------|------------------------|---|
| UP_KEYWORDS          | <a href="#">DNA-binding</a>                                | RT                     |   |
| UP_KEYWORDS          | <a href="#">Transcription regulation</a>                   | RT                     |   |
| UP_KEYWORDS          | <a href="#">Transcription</a>                              | RT                     |   |
| GOTERM_BP_DIRECT     | <a href="#">transcription, DNA-templated</a>               | RT                     |   |
| GOTERM_MF_DIRECT     | <a href="#">DNA binding</a>                                | RT                     |   |
| INTERPRO             | <a href="#">Zinc finger, C2H2-like</a>                     | RT                     |   |
| INTERPRO             | <a href="#">Zinc finger, C2H2</a>                          | RT                     |   |
| GOTERM_BP_DIRECT     | <a href="#">regulation of transcription, DNA-templated</a> | RT                     |   |
| UP_KEYWORDS          | <a href="#">Nucleus</a>                                    | RT                     |   |
| SMART                | <a href="#">ZnF_C2H2</a>                                   | RT                     |   |
| GOTERM_CC_DIRECT     | <a href="#">nucleus</a>                                    | RT                     |   |
| Annotation Cluster 2 |                                                            | Enrichment Score: 2.3  | G |
| UP_KEYWORDS          | <a href="#">Cytokine</a>                                   | RT                     |   |
| KEGG_PATHWAY         | <a href="#">Cytokine-cytokine receptor interaction</a>     | RT                     |   |
| GOTERM_MF_DIRECT     | <a href="#">cytokine activity</a>                          | RT                     |   |
| Annotation Cluster 3 |                                                            | Enrichment Score: 2.03 | G |
| UP_SEQ_FEATURE       | glycosylation site:N-linked (GlcNAc...)                    | RT                     |   |
| UP_KEYWORDS          | <a href="#">Glycoprotein</a>                               | RT                     |   |
| UP_SEQ_FEATURE       | signal peptide                                             | RT                     |   |
| UP_SEQ_FEATURE       | disulfide bond                                             | RT                     |   |
| UP_KEYWORDS          | <a href="#">Disulfide bond</a>                             | RT                     |   |
| UP_KEYWORDS          | <a href="#">Signal</a>                                     | RT                     |   |

**Supplementary Figure 2: Enrichment cluster analysis for subsets of genes with different behavior under different conditions.** Enrichment cluster analysis of 3 lists of genes was performed by using the DAVID functional annotation clustering tool. (A). Genes that are active (DRGs) under CTRL and SHH; (B) Genes that are silent under CTRL but are activated under SHH+; (C). Genes that are DRGs under SHH+ but silent under EGF+SHH+. For each GRM, the first two to three major clusters are presented here.

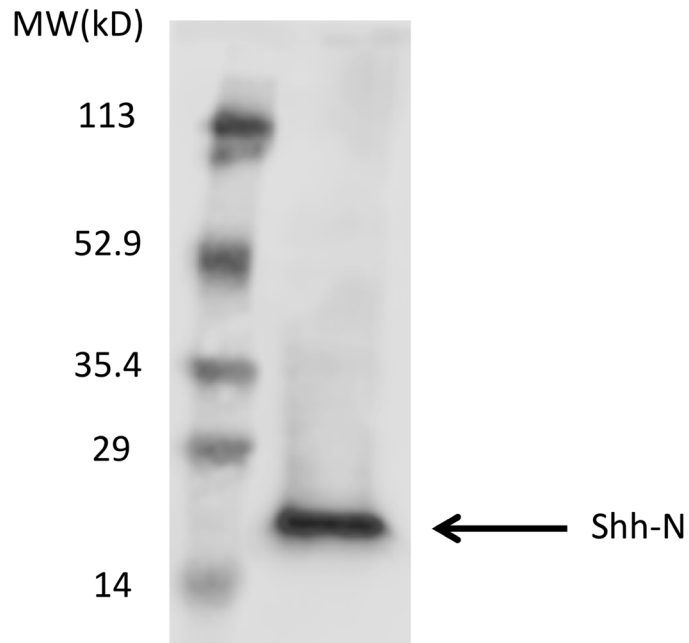

**Supplementary Figure 3: Western blot of SHH proteins.** The western blot of the conditioned media collected after transfecting HEK293 cell with Shh-N plasmid.

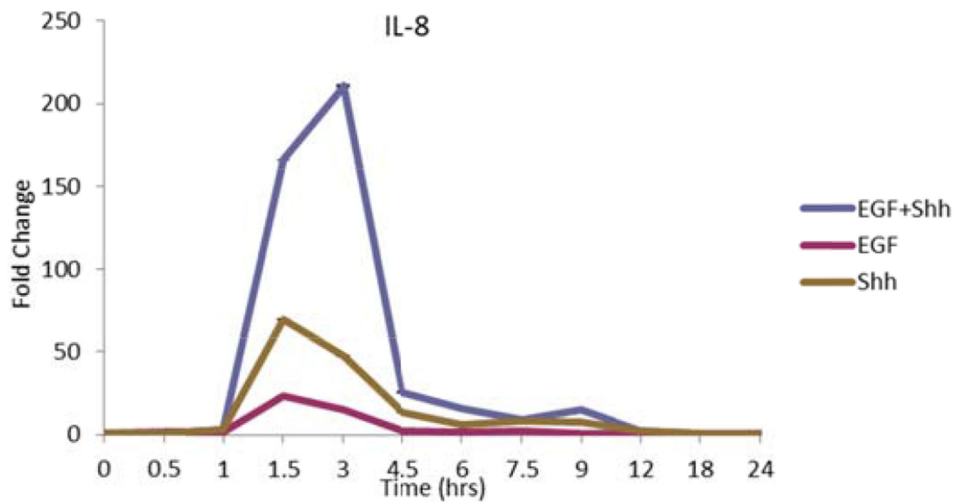

**Supplementary Figure 4: qRT-PCR validation of the *IL8* gene expression.** This figure confirms the synergism between EGF and SHH similar to the Götschel, F., et al. paper.

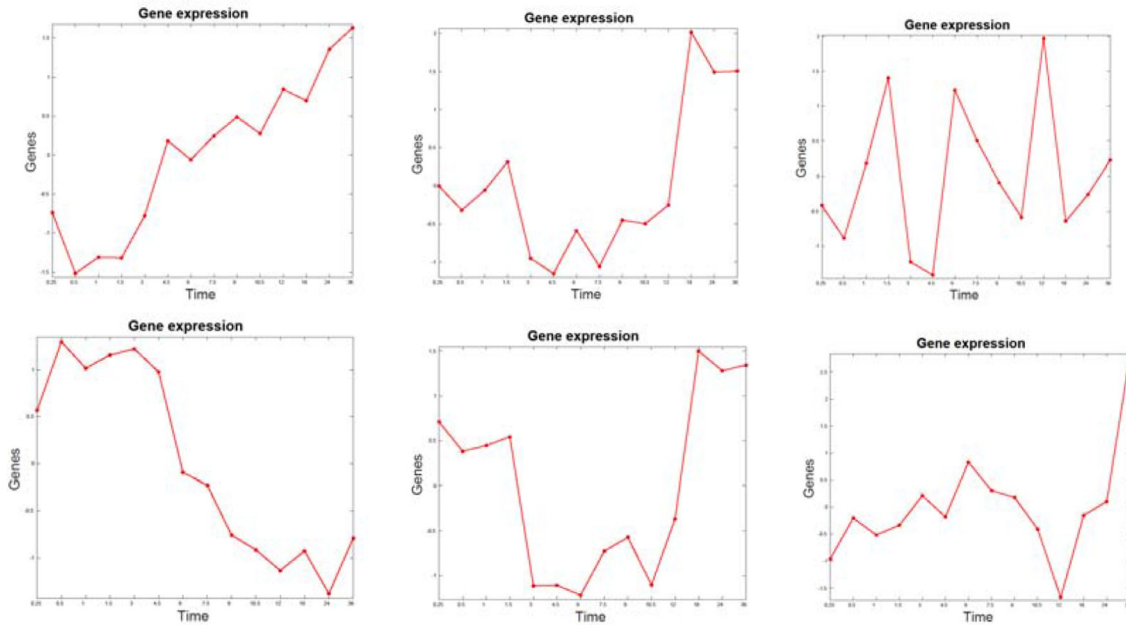

**Supplementary Figure 5: Spearman correlation and behavior similarity.** Each column presents the time-resolved behavior of one of the three genes (respectively, from left to right, *HLA-DMB*, *KHDC1*, and *ZC3HAV1*) under two conditions: control (top row) and EGF (bottom row). The corresponding correlations between the two curves in each column are  $\rho = -0.92$ ,  $0.94$ , and  $0.002$ , respectively. High negative (positive) values represents opposite (similar) behaviors under the two conditions.
